# Supplementary material
Source: PubMed Central journal article supplement (PMC6990668)
Supplement: jamapsychiatry-77-464-s002.pdf [file jamapsychiatry-77-464-s002.pdf]

## Supplementary Online Content

Dorsey S, Lucid L, Martin P, et al. Effectiveness of task-shifted trauma-focused cognitive behavioral therapy for children who experienced parental death and posttraumatic stress in Kenya and Tanzania: a randomized clinical trial. *JAMA Psychiatry*. Published online January 22, 2020.

doi:10.1001/jamapsychiatry.2019.4475

**eTable 1.** Treatment Effects on Guardian-Reported Posttraumatic Stress and Child-Reported Prolonged Grief at Post-Treatment and at 12 Month Follow-up

**eTable 2.** Post-Treatment and 12 Month Follow-up Outcomes for Guardian-Reported Posttraumatic Stress by Study Condition, Country, and Area

**eTable 3.** Post-Treatment and 12 Month Follow-up Outcomes for Child-Reported Grief by Study Condition, Country, and Area

**eTable 4.** Treatment Effects on Child-Reported and Guardian-Reported Behavior Problems at Post-Treatment and at 12 Month Follow-up

**eTable 5.** Post-Treatment and 12 Month Follow-up Outcomes for Child-Reported Behavior Problems by Study Condition, Country, and Area

**eTable 6.** Post-Treatment and 12 Month Follow-up Outcomes for Guardian-Reported Behavior Problems by Study Condition, Country, and Area

**eTable 7.** Treatment Effects on Child-Reported and Guardian-Reported Depressive and Internalizing Symptoms at Post-Treatment and at 12 Month Follow-up

**eTable 8.** Post-Treatment and 12 Month Follow-up Outcomes for Child-Reported Depressive and Internalizing Symptoms by Study Condition, Country, and Area

**eTable 9.** Post-Treatment and 12 Month Follow-up Outcomes for Guardian-Reported Depressive and Internalizing Symptoms by Study Condition, Country, and Area

**eTable 10.** Treatment Effects on Guardian-Reported Relationship Closeness and Relationship Conflicts at Post-Treatment and at 12 Month Follow-up

**eTable 11.** Post-Treatment and 12 Month Follow-up Outcomes for Guardian-Reported Relationship Closeness by Study Condition, Country, and Area

**eTable 12.** Post-Treatment and 12 Month Follow-up Outcomes for Guardian-Reported Relationship Conflicts by Study Condition, Country, and Area

This supplementary material has been provided by the authors to give readers additional information about their work.

**eTable 1.** Treatment Effects on Guardian-Reported Posttraumatic Stress and Child-Reported Prolonged Grief at Post-Treatment and at 12 Month Follow-up

|                               | Post-Treatment<br>Guardian-<br>Reported<br>PTS | 12 Month<br>Guardian-<br>Reported<br>PTS | Post-Treatment<br>Child-<br>Reported Grief | 12 Month<br>Child-Reported<br>Grief       |
|-------------------------------|------------------------------------------------|------------------------------------------|--------------------------------------------|-------------------------------------------|
|                               | b (95% CI)                                     |                                          | b (95% CI)                                 |                                           |
| Condition                     | 4.98***<br>(3.27, 6.69)                        | 8.13***<br>(6.65, 9.61)                  | 5.97**<br>(1.66, 10.28)                    | 12.48***<br>(8.83, 16.12)                 |
| Baseline Score                | 0.07<br>(0.00, 0.13)                           | 0.03<br>(-0.03, 0.08)                    | 0.21***<br>(0.14, 0.28)                    | 0.16***<br>(0.10, 0.22)                   |
| Country                       | -2.08**<br>(-3.61, -0.56)                      | -2.47***<br>(-3.53, -1.42)               | -1.87<br>(-6.21, 2.47)                     | -3.51*<br>(-6.43, -0.59)                  |
| Sex                           | -0.84*<br>(-1.64, -0.04)                       | 0.78<br>(-0.02, 1.57)                    | -1.34<br>(-3.88, 1.20)                     | 1.45<br>(-0.68, 3.58)                     |
| Age                           | -0.18<br>(-0.50, 0.14)                         | -0.18<br>(-0.43, 0.08)                   | 0.23<br>(-0.88, 1.34)                      | -0.28<br>(-0.96, 0.39)                    |
| Area                          | 0.63<br>(-1.37, 2.62)                          | -0.02<br>(-0.87, 0.82)                   | 0.48<br>(-4.67, 5.63)                      | -1.75<br>(-3.97, 0.47)                    |
| Condition x<br>Country        | -2.51*<br>(-4.93, -0.09)                       | -6.81*** <sup>a</sup><br>(-8.68, -4.93)  | -0.34<br>(-6.76, 6.90)                     | -10.06*** <sup>a</sup><br>(-14.61, -5.50) |
| Condition x Age               | -0.13<br>(-0.65, 0.39)                         |                                          | -1.50<br>(-3.10, 0.10)                     |                                           |
| Condition x<br>Baseline Score | 0.11*<br>(0.01, 0.22)                          |                                          |                                            |                                           |
| Condition x Area              | 7.04***<br>(3.97, 10.10)                       |                                          | 10.76**<br>(3.20, 18.32)                   |                                           |
| Country x Area                | -2.88*<br>(-5.25, -0.51)                       |                                          | -4.09<br>(-11.32, 3.14)                    |                                           |
| Condition x<br>Country x Area | -7.61*** <sup>a</sup><br>(-11.36, -<br>3.86)   |                                          | -17.93*** <sup>a</sup><br>(-28.56, -7.29)  |                                           |
| Constant                      | 10.31***<br>(9.16, 11.47)                      | 7.36***<br>(6.29, 8.44)                  | 12.04***<br>(7.71, 16.38)                  | 7.50***<br>(3.79, 11.20)                  |
| Observations                  | 631                                            | 624                                      | 629                                        | 624                                       |

Note: The post-treatment assessment was conducted at treatment completion, which was 3 months from baseline for both conditions. The 12 month follow-up assessment was conducted 1-year after treatment (completion of the 3-month RCT), which was 15 months from baseline for both conditions. \* $p < 0.05$ ; \*\* $p < 0.01$ ; \*\*\* $p < 0.001$ . <sup>a</sup>Bonferroni adjusted p-value.

**eTable 2.** Post-Treatment and 12 Month Follow-up Outcomes for Guardian-Reported Posttraumatic Stress by Study Condition, Country, and Area

| Site                           | TF-CBT<br>Mean (SD) |                   |             |  | Usual Care<br>Mean (SD) |                    |              |  | Effect sizes                                   |                                      |
|--------------------------------|---------------------|-------------------|-------------|--|-------------------------|--------------------|--------------|--|------------------------------------------------|--------------------------------------|
|                                | Baseline            | Post<br>Treatment | 12 Month    |  | Baseline                | Post-<br>Treatment | 12 Month     |  | Post-<br>Treatment<br>Effect Size<br>(95% CIs) | 12 Month<br>Effect Size<br>(95% CIs) |
| Urban Kenya<br>(n = 192)       | 21.98 (6.32)        | 9.94 (5.18)       | 9.16 (6.35) |  | 20.61 (7.68)            | 14.71 (7.11)       | 16.86 (9.24) |  | 0.71***<br>(0.46, 0.95)                        | 1.15***<br>(0.94, 1.36)              |
| Rural Kenya<br>(n = 128)       | 23.69 (6.58)        | 10.77 (6.38)      | 6.98 (3.71) |  | 23.39 (9.29)            | 23.06 (8.09)       | 15.00 (8.91) |  | 1.47***<br>(1.18, 1.76)                        | 0.98***<br>(0.77, 1.19)              |
| Urban<br>Tanzania<br>(n = 192) | 22.08 (7.48)        | 7.80 (5.51)       | 4.89 (3.41) |  | 18.81 (8.25)            | 9.68 (6.42)        | 6.07 (4.60)  |  | 0.32**<br>(0.13, 0.51)                         | 0.15*<br>(0.02, 0.28)                |
| Rural<br>Tanzania<br>(n = 128) | 21.33 (8.07)        | 5.56 (3.00)       | 6.11 (3.87) |  | 18.92 (7.33)            | 7.02 (4.69)        | 7.27 (6.48)  |  | 0.24*<br>(0.01, 0.47)                          | 0.16*<br>(0.02, 0.29)                |

Note: TF-CBT: Trauma-focused Cognitive Behavioral Therapy. 3 urban cohorts; 2 rural cohorts (thus differences in sample sizes). Outcome means are reported based on raw data, while effect sizes are model estimated effect sizes for each outcome by area and country. The post-treatment effect size represents the difference in mean change between the TF-CBT and Usual Care (UC) conditions from baseline to post-treatment. The 12 month effect size represents the difference in mean change between the TF-CBT and UC conditions from baseline to the 12 month follow-up. Effect sizes are reported by country, area, and condition, even though at the 12 month follow-up only the country x condition interaction is significant. \* $p < 0.05$ ; \*\* $p < 0.01$ ; \*\*\* $p < .001$ .

**eTable 3.** Post-Treatment and 12 Month Follow-up Outcomes for Child-Reported Prolonged Grief by Study Condition, Country, and Area

| Site                        | TF-CBT<br>Mean (SD) |                |               |  | Usual Care<br>Mean (SD) |                |               | Effect sizes                         |                                |
|-----------------------------|---------------------|----------------|---------------|--|-------------------------|----------------|---------------|--------------------------------------|--------------------------------|
|                             | Baseline            | Post-Treatment | 12 Month      |  | Baseline                | Post-Treatment | 12 Month      | Post-Treatment Effect Size (95% CIs) | 12 Month Effect Size (95% CIs) |
| Urban Kenya<br>(n = 192)    | 42.45 (16.84)       | 20.32 (15.35)  | 15.97 (14.12) |  | 38.34 (16.18)           | 25.19 (15.20)  | 26.76 (20.70) | 0.36**<br>(0.10, 0.62)               | 0.75***<br>(0.53, 0.97)        |
| Rural Kenya<br>(n = 128)    | 44.38 (22.02)       | 21.09 (11.91)  | 12.69 (11.63) |  | 42.48 (19.52)           | 38.13 (21.99)  | 26.09 (21.35) | 0.81***<br>(0.51, 1.11)              | 0.60***<br>(0.43, 0.78)        |
| Urban Tanzania<br>(n = 196) | 44.73 (17.67)       | 18.97 (15.99)  | 11.32 (10.03) |  | 40.63 (14.83)           | 22.90 (18.69)  | 13.92 (13.70) | 0.34*<br>(0.05, 0.64)                | 0.15<br>(-0.02, 0.32)          |
| Rural Tanzania<br>(n = 128) | 49.17 (21.21)       | 16.00 (20.12)  | 12.16 (14.23) |  | 43.14 (20.25)           | 13.44 (14.23)  | 11.70 (9.31)  | -0.07<br>(-0.35, 0.21)               | 0.12<br>(-0.02, 0.25)          |

Note: TF-CBT: Trauma-focused Cognitive Behavioral Therapy. 3 urban cohorts; 2 rural cohorts (thus differences in sample sizes). Outcome means are reported based on raw data, while effect sizes are model estimated effect sizes for each outcome by area and country. The post-treatment effect size represents the difference in mean change between the TF-CBT and Usual Care (UC) conditions from baseline to post-treatment. The 12 month effect size represents the difference in mean change between the TF-CBT and UC conditions from baseline to the 12 month follow-up. Effect sizes are reported by country, area, and condition, even though at the 12 month follow-up only the country x condition interaction is significant. \* $p < 0.05$ ; \*\* $p < 0.01$ ; \*\*\* $p < .001$ .

**eTable 4.** Treatment Effects on Child-Reported and Guardian-Reported Behavior Problems at Post-Treatment and at 12 Month Follow-up

|                            | Post-Treatment Child-Reported Behavior Problems | 12 Month Child-Reported Behavior Problems | Post-Treatment Guardian-Reported Behavior Problems | 12 Month Guardian-Reported Behavior Problems |
|----------------------------|-------------------------------------------------|-------------------------------------------|----------------------------------------------------|----------------------------------------------|
|                            | b (95% CI)                                      |                                           | b (95% CI)                                         |                                              |
| Condition                  | -0.04<br>(-0.09, 0.01)                          | 0.06**<br>(0.02, 0.10)                    | 0.01<br>(-0.03, 0.04)                              | 0.06***<br>(0.04, 0.09)                      |
| Baseline Score             | 0.14***<br>(0.07, 0.21)                         | 0.06<br>(-0.001, 0.13)                    | 0.25***<br>(0.20, 0.30)                            | 0.10***<br>(0.05, 0.14)                      |
| Country                    | -0.07**<br>(-0.10, -0.03)                       | -0.003<br>(-0.03, 0.03)                   | -0.03*<br>(-0.06, -0.01)                           | -0.02**<br>(-0.04, -0.01)                    |
| Sex                        | -0.002<br>(-0.01, 0.01)                         | 0.02**<br>(0.01, 0.03)                    | 0.01<br>(-0.01, 0.02)                              | 0.02*<br>(0.004, 0.03)                       |
| Age                        | 0.001<br>(-0.01, 0.01)                          | -0.004<br>(-0.01, 0.004)                  | -0.004<br>(-0.01, 0.0005)                          | -.002<br>(-0.01, 0.002)                      |
| Area                       | -0.03<br>(-0.08, 0.03)                          | -0.02*<br>(-0.03, -0.004)                 | -0.002<br>(-0.04, 0.04)                            | -0.01<br>(-0.02, 0.005)                      |
| Condition x Country        | 0.06*<br>(0.01, 0.12)                           | -0.06*a<br>(-0.10, -0.02)                 | 0.01<br>(-0.04, 0.05)                              | -0.04 <sup>a</sup><br>(-0.08, -0.01)         |
| Condition x Area           | 0.06<br>(-0.01, 0.14)                           |                                           | 0.04<br>(-0.02, 0.11)                              |                                              |
| Country x Area             | 0.04<br>(-0.02, 0.09)                           |                                           | 0.01<br>(-0.03, 0.06)                              |                                              |
| Condition x Country x Area | -0.09 <sup>a</sup><br>(-0.17, -0.02)            |                                           | -0.03 <sup>a</sup><br>(-0.11, 0.04)                |                                              |
| Constant                   | 0.11***<br>(0.08, 0.15)                         | 0.07***<br>(0.03, 0.10)                   | 0.08***<br>(0.05, 0.10)                            | 0.08***<br>(0.06, 0.10)                      |
| Observations               | 375 <sup>b</sup>                                | 371 <sup>b</sup>                          | 630                                                | 622                                          |

Note: The post-treatment assessment was conducted at treatment completion, which was 3 months from baseline for both conditions. The 12 month follow-up assessment was conducted 1-year after treatment (completion of the 3-month RCT), which was 15 months from baseline for both conditions. \* $p < 0.05$ ; \*\* $p < 0.01$ ; \*\*\* $p < .001$ . <sup>a</sup>Bonferroni adjusted p-value. <sup>b</sup>Only a subsample of children, those 11 years and older, completed the Youth Self-Report Checklist (thus differences in sample sizes).

**eTable 5.** Post-Treatment and 12 Month Follow-up Outcomes for Child-Reported Behavior Problems by Study Condition, Country, and Area

| Site                        | TF-CBT<br>Mean (SD) |                |             |  | Usual Care<br>Mean (SD) |                |             |  | Effect sizes                         |                                |
|-----------------------------|---------------------|----------------|-------------|--|-------------------------|----------------|-------------|--|--------------------------------------|--------------------------------|
|                             | Baseline            | Post-Treatment | 12 Month    |  | Baseline                | Post-Treatment | 12 Month    |  | Post-Treatment Effect Size (95% CIs) | 12 Month Effect Size (95% CIs) |
| Urban Kenya<br>(n = 192)    | 0.21 (0.19)         | 0.14 (0.15)    | 0.10 (0.11) |  | 0.15 (0.11)             | 0.09 (0.11)    | 0.15 (0.17) |  | -0.25<br>(-0.56, 0.05)               | 0.39**<br>(0.14, 0.64)         |
| Rural Kenya<br>(n = 128)    | 0.18 (0.13)         | 0.11 (0.14)    | 0.05 (0.04) |  | 0.13 (0.11)             | 0.13 (0.09)    | 0.12 (0.18) |  | 0.18<br>(-0.28, 0.64)                | 0.48**<br>(0.17, 0.79)         |
| Urban Tanzania<br>(n = 192) | 0.11 (0.09)         | 0.06 (0.07)    | 0.08 (0.05) |  | 0.11 (0.08)             | 0.09 (0.05)    | 0.08 (0.05) |  | 0.27*<br>(0.03, 0.51)                | -0.01<br>(-0.15, 0.13)         |
| Rural Tanzania<br>(n = 128) | 0.11 (0.09)         | 0.08 (0.04)    | 0.07 (0.03) |  | 0.07 (0.06)             | 0.06 (0.04)    | 0.06 (0.03) |  | -0.11<br>(-0.35, 0.13)               | -0.01<br>(-0.16, 0.14)         |

*Note:* TF-CBT: Trauma-focused Cognitive Behavioral Therapy. 3 urban cohorts; 2 rural cohorts (thus differences in sample sizes). Outcome means are reported based on raw data, while effect sizes are model estimated effect sizes for each outcome by area and country. The post-treatment effect size represents the difference in mean change between the TF-CBT and Usual Care (UC) conditions from baseline to post-treatment. Only a subsample of children, those 11 years and older, completed the Youth Self-Report Checklist. The 12 month effect size represents the difference in mean change between the TF-CBT and UC conditions from baseline to the 12 month follow-up. Effect sizes are reported by country, area, and condition, even though at the 12 month follow-up only the country x condition interaction is significant. \* $p < 0.05$ ; \*\* $p < 0.01$ ; \*\*\* $p < 0.001$ .

**eTable 6.** Post-Treatment and 12 Month Follow-up Outcomes for Guardian-Reported Behavior Problems by Study Condition, Country, and Area

| Site                        | TF-CBT<br>Mean (SD) |                |             |  | Usual Care<br>Mean (SD) |                |             |  | Effect sizes                         |                                |
|-----------------------------|---------------------|----------------|-------------|--|-------------------------|----------------|-------------|--|--------------------------------------|--------------------------------|
|                             | Baseline            | Post-Treatment | 12 Month    |  | Baseline                | Post-Treatment | 12 Month    |  | Post-Treatment Effect Size (95% CIs) | 12 Month Effect Size (95% CIs) |
| Urban Kenya<br>(n = 192)    | 0.25 (0.20)         | 0.14 (0.14)    | 0.12 (0.11) |  | 0.18 (0.14)             | 0.13 (0.13)    | 0.18 (0.16) |  | 0.04<br>(-0.16, 0.25)                | 0.36***<br>(0.21, 0.52)        |
| Rural Kenya<br>(n = 128)    | 0.13 (0.14)         | 0.11 (0.14)    | 0.08 (0.07) |  | 0.14 (0.13)             | 0.16 (0.17)    | 0.14 (0.19) |  | 0.37<br>(0.00, 0.75)                 | 0.47***<br>(0.27, 0.67)        |
| Urban Tanzania<br>(n = 192) | 0.17 (0.16)         | 0.09 (0.07)    | 0.07 (0.05) |  | 0.16 (0.11)             | 0.10 (0.11)    | 0.09 (0.11) |  | 0.10<br>(-0.09, 0.29)                | 0.16*<br>(0.00, 0.32)          |
| Rural Tanzania<br>(n = 128) | 0.12 (0.09)         | 0.09 (0.06)    | 0.07 (0.06) |  | 0.15 (0.11)             | 0.12 (0.13)    | 0.10 (0.11) |  | 0.23<br>(-0.07, 0.53)                | 0.22*<br>(0.00, 0.43)          |

*Note:* TF-CBT: Trauma-focused Cognitive Behavioral Therapy. 3 urban cohorts; 2 rural cohorts (thus differences in sample sizes). Outcome means are reported based on raw data, while effect sizes are model estimated effect sizes for each outcome by area and country. The post-treatment effect size represents the difference in mean change between the TF-CBT and Usual Care (UC) conditions from baseline to post-treatment. The 12 month effect size represents the difference in mean change between the TF-CBT and UC conditions from baseline to the 12 month follow-up. Effect sizes are reported by country, area, and condition, even though at the 12 month follow-up only the country x condition interaction is significant. \* $p < 0.05$ ; \*\* $p < 0.01$ ; \*\*\* $p < .001$ .

**eTable 7.** Treatment Effects on Child-Reported and Guardian-Reported Depressive and Internalizing Symptoms at Post-Treatment and at 12 Month Follow-up

|                               | Post-Treatment<br>Child-Reported<br>Depressive<br>Symptoms | 12 Month Child-<br>Reported<br>Depressive<br>Symptoms | Post-<br>Treatment<br>Guardian-<br>Reported<br>Depressive<br>Symptoms | 12 Month<br>Guardian-<br>Reported<br>Depressive<br>Symptoms |
|-------------------------------|------------------------------------------------------------|-------------------------------------------------------|-----------------------------------------------------------------------|-------------------------------------------------------------|
|                               | b (95% CI)                                                 |                                                       | b (95% CI)                                                            |                                                             |
| Condition                     | 0.07<br>(-0.02, 0.17)                                      | 0.20***<br>(0.13, 0.27)                               | 0.05<br>(-0.02, 0.12)                                                 | 0.17***<br>(0.12, 0.22)                                     |
| Baseline Score                | 0.18***<br>(0.12, 0.24)                                    | 0.20***<br>(0.15, 0.26)                               | 0.13***<br>(0.08, 0.19)                                               | 0.09**<br>(0.04, 0.13)                                      |
| Country                       | -0.10*<br>(-0.18, -0.02)                                   | -0.05<br>(-0.10, 0.004)                               | -0.12***<br>(-0.17, -0.07)                                            | -0.09***<br>(-0.13, -0.05)                                  |
| Sex                           | -0.04*<br>(-0.07, -0.01)                                   | 0.01<br>(-0.02, 0.04)                                 | -0.02<br>(-0.04, 0.004)                                               | 0.001<br>(-0.02, 0.02)                                      |
| Age                           | 0.02<br>(0.0001, 0.04)                                     | 0.003<br>(-0.01, 0.02)                                | -0.005<br>(-0.01, 0.001)                                              | -0.003<br>(-0.01, 0.003)                                    |
| Area                          | -0.03<br>(-0.15, 0.09)                                     | -0.02<br>(-0.05, 0.01)                                | -0.03<br>(-0.10, 0.04)                                                | -0.01<br>(-0.02, 0.01)                                      |
| Condition x Country           | -0.04<br>(-0.14, 0.06)                                     | -0.17*** <sup>a</sup><br>(-0.24, -0.09)               | -0.03<br>(-0.10, 0.05)                                                | -0.16*** <sup>a</sup><br>(-0.21, -0.10)                     |
| Condition x Area              | 0.17<br>(-0.002, 0.35)                                     |                                                       | 0.22***<br>(0.11, 0.32)                                               |                                                             |
| Country x Area                | 0.05<br>(-0.09, 0.18)                                      |                                                       | 0.03<br>(-0.05, 0.11)                                                 |                                                             |
| Condition x Country x<br>Area | -0.21 <sup>a</sup><br>(-0.40, -0.02)                       |                                                       | -0.23*** <sup>a</sup><br>(-0.34, -0.11)                               |                                                             |
| Constant                      | 0.24***<br>(0.16, 0.32)                                    | 0.14***<br>(0.08, 0.20)                               | 0.25***<br>(0.19, 0.31)                                               | 0.21***<br>(0.16, 0.25)                                     |
| Observations                  | 375 <sup>b</sup>                                           | 371 <sup>b</sup>                                      | 630                                                                   | 622                                                         |

Note: The post-treatment assessment was conducted at treatment completion, which was 3 months from baseline for both conditions. The 12 month follow-up assessment was conducted 1-year after treatment (completion of the 3-month RCT), which was 15 months from baseline for both conditions. \* $p < 0.05$ ; \*\* $p < 0.01$ ; \*\*\* $p < .001$ . <sup>a</sup>Bonferroni adjusted p-value. <sup>b</sup>Only a subsample of children, those 11 years and older, completed the Youth Self-Report Checklist (thus differences in sample sizes).



**eTable 8.** Post-Treatment and 12 Month Follow-up Outcomes for Child-Reported Depressive and Internalizing Symptoms by Study Condition, Country, and Area

| Site                     | TF-CBT Mean (SD) |                |             |  | Usual Care Mean (SD) |                |             |  | Effect sizes                         |                                |
|--------------------------|------------------|----------------|-------------|--|----------------------|----------------|-------------|--|--------------------------------------|--------------------------------|
|                          | Baseline         | Post-Treatment | 12 Month    |  | Baseline             | Post-Treatment | 12 Month    |  | Post-Treatment Effect Size (95% CIs) | 12 Month Effect Size (95% CIs) |
| Urban Kenya (n = 192)    | 0.66 (0.34)      | 0.33 (0.25)    | 0.27 (0.18) |  | 0.50 (0.30)          | 0.38 (0.27)    | 0.47 (0.26) |  | 0.23 (-0.06, 0.51)                   | 0.61*** (0.41, 0.82)           |
| Rural Kenya (n = 128)    | 0.63 (0.32)      | 0.30 (0.22)    | 0.26 (0.14) |  | 0.52 (0.34)          | 0.53 (0.35)    | 0.35 (0.35) |  | 0.75** (0.29, 1.20)                  | 0.60*** (0.40, 0.80)           |
| Urban Tanzania (n = 192) | 0.34 (0.21)      | 0.18 (0.17)    | 0.16 (0.10) |  | 0.30 (0.17)          | 0.21 (0.14)    | 0.19 (0.10) |  | 0.17 (-0.09, 0.43)                   | 0.17* (0.02, 0.33)             |
| Rural Tanzania (n = 128) | 0.41 (0.36)      | 0.21 (0.12)    | 0.17 (0.16) |  | 0.23 (0.16)          | 0.18 (0.10)    | 0.15 (0.08) |  | 0.00 (-0.18, 0.18)                   | 0.11* (0.01, 0.22)             |

*Note:* TF-CBT: Trauma-focused Cognitive Behavioral Therapy. 3 urban cohorts; 2 rural cohorts (thus differences in sample sizes). Outcome means are reported based on raw data, while effect sizes are model estimated effect sizes for each outcome by area and country. The post-treatment effect size represents the difference in mean change between the TF-CBT and Usual Care (UC) conditions from baseline to post-treatment. Only a subsample of children, those 11 years and older, completed the Youth Self-Report Checklist. The 12 month effect size represents the difference in mean change between the TF-CBT and UC conditions from baseline to the 12 month follow-up. Effect sizes are reported by country, area, and condition, even though at the 12 month follow-up only the country x condition interaction is significant. \* $p < 0.05$ ; \*\* $p < 0.01$ ; \*\*\* $p < 0.001$ .

**eTable 9.** Post-Treatment and 12 Month Follow-up Outcomes for Guardian-Reported Depressive and Internalizing Symptoms by Study Condition, Country, and Area

| Site                        | TF-CBT<br>Mean (SD) |                |             |  | Usual Care<br>Mean (SD) |                |             |  | Effect sizes                         |                                |
|-----------------------------|---------------------|----------------|-------------|--|-------------------------|----------------|-------------|--|--------------------------------------|--------------------------------|
|                             | Baseline            | Post-Treatment | 12 Month    |  | Baseline                | Post-Treatment | 12 Month    |  | Post-Treatment Effect Size (95% CIs) | 12 Month Effect Size (95% CIs) |
| Urban Kenya<br>(n = 192)    | 0.58 (0.30)         | 0.32 (0.22)    | 0.28 (0.18) |  | 0.48 (0.30)             | 0.36 (0.25)    | 0.46 (0.28) |  | 0.17 (-0.05, 0.39)                   | 0.55*** (0.39, 0.72)           |
| Rural Kenya<br>(n = 128)    | 0.48 (0.30)         | 0.28 (0.18)    | 0.21 (0.14) |  | 0.48 (0.34)             | 0.55 (0.29)    | 0.34 (0.30) |  | 0.85*** (0.59, 1.10)                 | 0.52*** (0.37, 0.68)           |
| Urban Tanzania<br>(n = 192) | 0.26 (0.16)         | 0.16 (0.10)    | 0.13 (0.07) |  | 0.27 (0.15)             | 0.18 (0.14)    | 0.15 (0.09) |  | 0.16 (-0.05, 0.38)                   | 0.07 (-0.04, 0.19)             |
| Rural Tanzania<br>(n = 128) | 0.20 (0.14)         | 0.15 (0.07)    | 0.14 (0.07) |  | 0.21 (0.11)             | 0.17 (0.09)    | 0.14 (0.08) |  | 0.16 (-0.10, 0.41)                   | 0.09 (-0.05, 0.23)             |

*Note:* TF-CBT: Trauma-focused Cognitive Behavioral Therapy. 3 urban cohorts; 2 rural cohorts (thus differences in sample sizes). Outcome means are reported based on raw data, while effect sizes are model estimated effect sizes for each outcome by area and country. The post-treatment effect size represents the difference in mean change between the TF-CBT and Usual Care (UC) conditions from baseline to post-treatment. The 12 month effect size represents the difference in mean change between the TF-CBT and UC conditions from baseline to the 12 month follow-up. Effect sizes are reported by country, area, and condition, even though at the 12 month follow-up only the country x condition interaction is significant. \* $p < 0.05$ ; \*\* $p < 0.01$ ; \*\*\* $p < .001$ .

**eTable 10.** Treatment Effects on Guardian-Reported Relationship Closeness and Relationship Conflicts at Post-Treatment and at 12 Month Follow-up

|                               | Post-Treatment<br>Guardian-<br>Reported<br>Relationship<br>Closeness | 12 Month<br>Guardian-<br>Reported<br>Relationship<br>Closeness | Post-<br>Treatment<br>Guardian-<br>Reported<br>Relationship<br>Conflicts | 12 Month<br>Guardian-<br>Reported<br>Relationship<br>Conflicts |
|-------------------------------|----------------------------------------------------------------------|----------------------------------------------------------------|--------------------------------------------------------------------------|----------------------------------------------------------------|
|                               | b (95% CI)                                                           |                                                                | b (95% CI)                                                               |                                                                |
| Condition                     | -1.15*<br>(-2.19, -0.10)                                             | -3.06***<br>(-4.06, -2.05)                                     | 1.45*<br>(0.31, 2.60)                                                    | 2.07***<br>(1.16, 2.98)                                        |
| Baseline Score                | 0.13**<br>(0.05, 0.20)                                               | 0.09*<br>(0.01, 0.17)                                          | 0.26***<br>(0.20, 0.31)                                                  | 0.10**<br>(0.04, 0.15)                                         |
| Country                       | -5.33***<br>(-6.40, -4.26)                                           | -7.23***<br>(-8.12, -6.34)                                     | -1.46**<br>(-2.44, -0.49)                                                | -2.80***<br>(-3.53, -2.07)                                     |
| Sex                           | -0.67*<br>(-1.29, -0.05)                                             | -0.68*<br>(-1.32, -0.04)                                       | 0.15<br>(-0.28, 0.58)                                                    | 0.38<br>(-0.01, 0.77)                                          |
| Age                           | -0.25*<br>(-0.44, -0.05)                                             | -0.18<br>(-0.38, 0.02)                                         | -0.01<br>(-0.14, 0.13)                                                   | 0.04<br>(-0.08, 0.17)                                          |
| Area                          | -0.39<br>(-1.77, 0.99)                                               | -0.36<br>(-1.05, 0.33)                                         | 0.76<br>(-0.51, 2.02)                                                    | 0.10<br>(-0.30, 0.50)                                          |
| Condition x Country           | 0.35<br>(-1.31, 2.01)                                                | 2.60*** <sup>a</sup><br>(1.26, 3.94)                           | -1.56*<br>(-2.91, -0.20)                                                 | -1.98*** <sup>a</sup><br>(-2.99, -0.96)                        |
| Condition x Area              | -1.50<br>(-3.62, 0.62)                                               |                                                                | -0.78<br>(-2.58, 1.03)                                                   |                                                                |
| Country x Area                | 0.50<br>(-1.28, 2.27)                                                |                                                                | -0.70<br>(-2.11, 0.72)                                                   |                                                                |
| Condition x Country x<br>Area | 1.20 <sup>a</sup><br>(-1.58, 3.97)                                   |                                                                | 0.55 <sup>a</sup><br>(-1.51, 2.61)                                       |                                                                |
| Constant                      | 22.58***<br>(20.65, 24.50)                                           | 24.53***<br>(22.47, 26.60)                                     | 2.11***<br>(1.14, 3.09)                                                  | 2.94***<br>(2.14, 3.75)                                        |
| Observations                  | 629                                                                  | 621                                                            | 629                                                                      | 621                                                            |

*Note:* The post-treatment assessment was conducted at treatment completion, which was 3 months from baseline for both conditions. The 12 month follow-up assessment was conducted 1-year after treatment (completion of the 3-month RCT), which was 15-months from baseline for both conditions. \* $p < 0.05$ ; \*\* $p < 0.01$ ; \*\*\* $p < .001$ . <sup>a</sup>Bonferroni adjusted p-value.

**eTable 11.** Post-Treatment and 12 Month Follow-up Outcomes for Guardian-Reported Relationship Closeness by Study Condition, Country, and Area

| Site                        | TF-CBT<br>Mean (SD) |                |              |  | Usual Care<br>Mean (SD) |                |              |  | Effect sizes                         |                                |
|-----------------------------|---------------------|----------------|--------------|--|-------------------------|----------------|--------------|--|--------------------------------------|--------------------------------|
|                             | Baseline            | Post-Treatment | 12 Month     |  | Baseline                | Post-Treatment | 12 Month     |  | Post-Treatment Effect Size (95% CIs) | 12 Month Effect Size (95% CIs) |
| Urban Kenya<br>(n = 192)    | 23.61 (4.31)        | 25.26 (3.18)   | 25.33 (4.75) |  | 23.02 (4.21)            | 24.00 (4.55)   | 22.93 (7.00) |  | 0.27*<br>(0.02, 0.51)                | 0.72***<br>(0.48, 0.95)        |
| Rural Kenya<br>(n = 128)    | 23.66 (4.40)        | 25.00 (4.18)   | 26.52 (2.66) |  | 20.78 (6.48)            | 21.98 (6.85)   | 22.94 (5.22) |  | 0.46**<br>(0.14, 0.79)               | 0.54***<br>(0.36, 0.71)        |
| Urban Tanzania<br>(n = 192) | 20.52 (3.15)        | 19.47 (4.24)   | 19.02 (3.32) |  | 19.65 (3.29)            | 18.45 (4.48)   | 18.43 (3.89) |  | 0.25<br>(0.15, 0.65)                 | 0.14<br>(0.14, 0.42)           |
| Rural Tanzania<br>(n = 128) | 19.52 (4.24)        | 19.59 (3.24)   | 17.43 (4.47) |  | 18.78 (4.36)            | 18.32 (3.33)   | 17.75 (3.51) |  | 0.25<br>(0.03, 0.54)                 | 0.11<br>(0.10, 0.31)           |

*Note:* TF-CBT: Trauma-focused Cognitive Behavioral Therapy. 3 urban cohorts; 2 rural cohorts (thus differences in sample sizes). Outcome means are reported based on raw data, while effect sizes are model estimated effect sizes for each outcome by area and country. The post-treatment effect size represents the difference in mean change between the TF-CBT and Usual Care (UC) conditions from baseline to post-treatment. The 12 month effect size represents the difference in mean change between the TF-CBT and UC conditions from baseline to the 12 month follow-up. Effect sizes are reported by country, area, and condition, even though at the 12 month follow-up only the country x condition interaction is significant. \* $p < 0.05$ ; \*\* $p < 0.01$ ; \*\*\* $p < .001$ .

**eTable 12.** Post-Treatment and 12 Month Follow-up Outcomes for Guardian-Reported Relationship Conflicts by Study Condition, Country, and Area

| Site                     | TF-CBT Mean (SD) |                |             |  | Usual Care Mean (SD) |                |             |  | Effect sizes                         |                                |
|--------------------------|------------------|----------------|-------------|--|----------------------|----------------|-------------|--|--------------------------------------|--------------------------------|
|                          | Baseline         | Post-Treatment | 12 Month    |  | Baseline             | Post-Treatment | 12 Month    |  | Post-Treatment Effect Size (95% CIs) | 12 Month Effect Size (95% CIs) |
| Urban Kenya (n = 192)    | 8.64 (5.30)      | 4.40 (4.20)    | 4.16 (4.66) |  | 7.35 (5.02)          | 5.52 (4.54)    | 5.48 (4.70) |  | 0.28* (0.06, 0.50)                   | 0.40*** (0.22, 0.58)           |
| Rural Kenya (n = 128)    | 5.39 (3.99)      | 4.33 (4.22)    | 3.55 (2.99) |  | 5.63 (4.21)          | 5.06 (4.23)    | 6.23 (4.29) |  | 0.17 (-0.18, 0.51)                   | 0.51*** (0.28, 0.73)           |
| Urban Tanzania (n = 192) | 3.54 (3.75)      | 1.58 (2.21)    | 0.73 (1.92) |  | 3.26 (4.09)          | 1.42 (2.91)    | 0.71 (2.18) |  | -0.03 (-0.21, 0.16)                  | 0.02 (-0.09, 0.14)             |
| Rural Tanzania (n = 128) | 2.27 (2.92)      | 1.34 (1.95)    | 0.54 (1.52) |  | 2.59 (2.91)          | 1.11 (2.11)    | 0.85 (2.12) |  | -0.12 (-0.35, 0.12)                  | 0.03 (-0.12, 0.18)             |

*Note:* TF-CBT: Trauma-focused Cognitive Behavioral Therapy. 3 urban cohorts; 2 rural cohorts (thus differences in sample sizes). Outcome means are reported based on raw data, while effect sizes are model estimated effect sizes for each outcome by area and country. The post-treatment effect size represents the difference in mean change between the TF-CBT and Usual Care (UC) conditions from baseline to post-treatment. The 12 month effect size represents the difference in mean change between the TF-CBT and UC conditions from baseline to the 12 month follow-up. Effect sizes are reported by country, area, and condition, even though at the 12 month follow-up only the country x condition interaction is significant. \* $p < 0.05$ ; \*\* $p < 0.01$ ; \*\*\* $p < .001$ .
