# Supplementary material
Source: PubMed Central journal article supplement (PMC6990668)
Supplement: jamapsychiatry-77-464-s003.pdf [file jamapsychiatry-77-464-s003.pdf]

## Data Sharing Statement

Dorsey. Effectiveness of Task-Shifted Trauma-Focused Cognitive Behavioral Therapy for Children Who Experienced Parental Death and Posttraumatic Stress in Kenya and Tanzania. *JAMA Psychiatry*. Published January 22, 2020. 10.1001/jamapsychiatry.2019.4475

### Data

**Data available:** Yes

**Data types:** Deidentified participant data, Data dictionary

**How to access data:** Requests for data may be sent to Dr. Dorsey at [dorsey2@uw.edu](mailto:dorsey2@uw.edu)

**When available:** With publication

### Supporting Documents

**Document types:** Statistical/analytic code, Informed consent form

**How to access documents:** Requests may be sent to Dr. Dorsey at [dorsey2@uw.edu](mailto:dorsey2@uw.edu)

**When available:** With publication

### Additional Information

**Who can access the data:** Researchers whose proposed use of the data has been approved

**Types of analyses:** for any purpose

**Mechanisms of data availability:** after approval of a proposal or with a signed data access agreement
